# Supplementary material
Source: PubMed Central journal article supplement (PMC122228)
Supplement: pnas_99_3_1550__1.pdf [file pnas_99_3_1550__1.pdf]

**Table 2.** The effect of deletion of *murM* on the cell wall stem peptide composition

| Peptide           | Pen6        | Pen6 $\Delta$ murM | Pen6 $\Delta$ murMpM3N | Pen6 $\Delta$ murMpM9N |
|-------------------|-------------|--------------------|------------------------|------------------------|
| <b>1</b>          | 3.0         | <b>41.4</b>        | 1.0                    | 1.0                    |
| <b>2</b>          | 0.8         | 4.9                | 0.7                    | 0.1                    |
| <b>3</b>          | <b>16.1</b> | 0.1                | <b>19.3</b>            | 0.7                    |
| <b>I</b>          | <b>15.1</b> | 0.1                | 3.1                    | <b>24.3</b>            |
| <b>II</b>         | 2.8         | 0.2                | 1.8                    | 5.6                    |
| <b>4</b>          | 2.8         | <b>45.4</b>        | 3.5                    | 0.8                    |
| <b>III</b>        | 2.8         | 0.4                | 0.9                    | 6.8                    |
| <b>5</b>          | 2.2         | 3.7                | 0.9                    | 0.4                    |
| <b>6</b>          | 2.7         | 0.1                | 2.9                    | 1.7                    |
| <b>7</b>          | <b>11.6</b> | 0.4                | <b>25.0</b>            | 3.6                    |
| <b>IV</b>         | <b>8.2</b>  | 0.3                | 4.9                    | 4.1                    |
| <b>V</b>          | <b>12.1</b> | 0.5                | 9.4                    | 12.7                   |
| <b>8</b>          | 2.0         | 0.2                | 9.7                    | 1.6                    |
| <b>VI</b>         | <b>10.8</b> | 0.6                | 9.4                    | <b>33.2</b>            |
| <b>9</b>          | 7.1         | 1.6                | 7.4                    | 3.2                    |
| <b>Total</b>      | 100         | 100                | 100                    | 100                    |
| MONOMERS          | 41          | 47                 | 27                     | 39                     |
| >MONOMERS         | 59          | 53                 | 73                     | 61                     |
| LINEAR PEPTIDES   | 12          | 94                 | 14                     | 4                      |
| BRANCHED PEPTIDES | 88          | 6                  | 86                     | 96                     |
| Serine Branched   | 49          | 5                  | 64                     | 22                     |
| Alanine Branched  | 40          | 1                  | 22                     | 74                     |
| % Branched S      | 55          | 75                 | 75                     | 23                     |
| % Branched A      | 45          | 25                 | 25                     | 77                     |
| B/L PEPTIDES      | 7.7         | 0.1                | 6.2                    | 21.3                   |
