# Supplementary material
Source: PubMed Central journal article supplement (PMC122228)
Supplement: pnas_99_3_1550__3.pdf [file pnas_99_3_1550__3.pdf]

**Table 3.** Enrichment of the cell wall of *S. pneumoniae* R36A in branched stem peptides in the plasmid transformant R36ApM18 carrying the *murM* gene from the penicillin-resistant strain KY17

| Peptide           | R36A        | KY17        | R36ApM18    |
|-------------------|-------------|-------------|-------------|
| <b>1</b>          | <b>15.9</b> | 4.4         | 3.2         |
| <b>2</b>          | 4.0         | 0.3         | 1.0         |
| <b>3</b>          | 2.7         | <b>29.5</b> | <b>19.9</b> |
| <b>I</b>          | 1.7         | 9.4         | 7.5         |
| <b>II</b>         | 1.7         | 2.4         | 2.4         |
| <b>4</b>          | <b>25.4</b> | 4.9         | 0.6         |
| <b>III</b>        | 2.1         | 1.3         | 1.1         |
| <b>5</b>          | 11.8        | 3.3         | 2.0         |
| <b>6</b>          | 6.9         | 1.9         | 1.4         |
| <b>7</b>          | 6.5         | <b>21.0</b> | <b>23.3</b> |
| <b>IV</b>         | 2.0         | 5.2         | 9.3         |
| <b>V</b>          | 2.4         | 5.3         | 10.1        |
| <b>8</b>          | 7.9         | 4.6         | 4.0         |
| <b>VI</b>         | 4.0         | 1.9         | 5.2         |
| <b>9</b>          | 4.9         | 4.6         | 9.0         |
| <b>Total</b>      | 100         | 100         | 100         |
| MONOMERS          | 28          | 47          | 35          |
| >MONOMERS         | 72          | 53          | 65          |
| LINEAR PEPTIDES   | 59          | 16          | 11          |
| BRANCHED PEPTIDES | 41          | 84          | 89          |
| Serine Branched   | 29          | 66          | 65          |
| Alamine Branched  | 12          | 18          | 24          |
| %Brached S        | 71          | 78          | 73          |
| %Brached A        | 29          | 22          | 27          |
| B/L PEPTIDES      | 0.7         | 5.6         | 8.3         |
